# Supplementary material for: Refining the Association Between Body Mass Index and Atrial Fibrillation: G‐Formula and Restricted Mean Survival Times
Source: PubMed Central journal article supplement — J Am Heart Assoc. 2019 Aug 8;8(16):e013011. doi: 10.1161/JAHA.119.013011 (PMC6759878; doi:10.1161/jaha.119.013011), 2019-08-08

# **Supplemental Material**

## Data S1.

### Supplemental Methods

#### *Parametric models for time-varying covariates*

We estimated the joint density of covariates at each year as the product of conditional densities given the covariate history by fitting parametric models for each covariate in the following order: smoking, BMI, SBP, DBP, antihypertensive treatment, diabetes, heart failure, and myocardial infarction. We fit logistic models for dichotomous covariates and linear models for continuous covariates. We checked the functional form for time and all covariates by assessing the differences between the natural course and observed data, and then fit the model with the most adequate transformation. Our final results included restricted cubic splines for time, BMI, SBP, and DBP.

#### *Pooled logistic models for hazard of atrial fibrillation*

We estimated the hazard of AF each year, conditional on the covariate history, with a pooled logistic model.<sup>42-45</sup> For an individual  $i$ , the probability of AF at year  $j$  is given by

$$\text{logit}(p_{ij}) = \beta_0 + Y_i(t_k)^T \boldsymbol{\gamma} + X_i^T \boldsymbol{\alpha} + r(t_k)\boldsymbol{\theta}$$

in which  $Y_i(t_j)$  denotes all observed time-varying covariates at year  $j$ ,  $X_i$  denotes time-invariant covariates (sex), and  $r(t_j)$  denotes a restricted cubic spline function. The estimated survival probabilities at year  $k$  are then given by  $\hat{S}(t_k) = \frac{1}{n} \sum_{i=1}^n \left( \prod_{j: t_j \leq t_k} (1 - \widehat{p}_{ij}) \right)$ , in which  $p_{ij}$  denotes the probability of AF for individual  $i$  at year  $j$ .<sup>41</sup>

In a sensitivity analysis, we estimated the hazard of AF with a pooled negative binomial model instead of a logistic model:

$$\log(\mu_{ij}) = \beta_0 + Y_i(t_k)^T \boldsymbol{\gamma} + X_i^T \boldsymbol{\alpha} + r(t_k)\boldsymbol{\theta}$$

where  $\mu_{ij}$  denotes the expected AF event count for individual  $i$  at year  $j$ .

**Table S1. Body mass index interventions and comparisons assessed with the g-formula.**

| <b>Intervention</b>                             | <b>Reference</b>                 |
|-------------------------------------------------|----------------------------------|
| Non-obese at all times, BMI [18.5, 29.9]        | Obese at all times, BMI [30, 40] |
| Non-obese at all times, BMI [18.5, 29.9]        | Natural course                   |
| 10% decrease in BMI per year when BMI $\geq$ 25 | Natural course                   |

**Table S2. Characteristics of participants by Framingham Heart Study cohort (n=4,392).**

|                                | Original (n=841) | Offspring (n=3,551) |
|--------------------------------|------------------|---------------------|
| Age (years)                    | 52.8 ± 1.7       | 50.3 ± 2            |
| Women                          | 468 (55.6)       | 1,877 (52.9)        |
| BMI (kg/m <sup>2</sup> )       | 26.3 ± 4.3       | 27.2 ± 5.1          |
| SBP (mm Hg)                    | 132 ± 19         | 124 ± 17            |
| DBP (mm Hg)                    | 83 ± 11          | 79 ± 10             |
| Current smoker                 | 191 (41.4)       | 993 (28)            |
| Use of hypertension medication | 75 (8.9)         | 504 (14.2)          |
| Diabetes                       | 17 (2.8)         | 181 (5.5)           |
| Heart failure                  | 3 (0.4)          | 10 (0.3)            |
| Myocardial infarction          | 25 (3.0)         | 70 (2.0)            |

Values are mean ± SD or n (%).

**Table S3. G-formula associations per body mass index intervention group and contrasts between intervention groups by sex at 20 years of follow-up.**

| <b>Men (n=2,047)</b>                                   | <b>Intervention</b>  | <b>Comparator</b>    | <b>Measure of Association</b> |                      |
|--------------------------------------------------------|----------------------|----------------------|-------------------------------|----------------------|
| <b>Non-obese vs. obese</b>                             |                      |                      |                               |                      |
| Risk, %                                                | 14.81 (12.33, 17.29) | 18.11 (14.79, 21.42) | Hazard ratio                  | 0.81 (0.63, 1.04)    |
|                                                        |                      |                      | Risk ratio                    | 0.82 (0.66, 1.01)    |
|                                                        |                      |                      | Risk difference               | -3.30 (-6.89, 0.30)  |
| RMST, years                                            | 18.78 (18.41, 19.14) | 18.62 (18.25, 18.98) | Difference in RMSTs, mos.     | 1.89 (-3.67, 7.44)   |
| <b>Non-obese vs. natural course</b>                    |                      |                      |                               |                      |
| Risk, %                                                | 14.87 (12.37, 17.37) | 15.51 (13.63, 17.39) | Hazard ratio                  | 0.96 (0.82, 1.14)    |
|                                                        |                      |                      | Risk ratio                    | 0.96 (0.85, 1.08)    |
|                                                        |                      |                      | Risk difference               | -0.64 (-2.48, 1.20)  |
| RMST, years                                            | 18.77 (18.40, 19.14) | 18.82 (18.66, 18.98) | Difference in RMSTs, mos.     | -0.61 (-4.70, 3.48)  |
| <b>10% decrease in BMI per year vs. natural course</b> |                      |                      |                               |                      |
| Risk, %                                                | 14.97 (13.02, 16.93) | 15.49 (13.64, 17.34) | Hazard ratio                  | 0.97 (0.87, 1.07)    |
|                                                        |                      |                      | Risk ratio                    | 0.97 (0.92, 1.02)    |
|                                                        |                      |                      | Risk difference               | -0.52 (-1.30, 0.26)  |
| RMST, years                                            | 18.84 (18.68, 19.01) | 18.82 (18.66, 18.98) | Difference in RMSTs, mos.     | 0.28 (-0.37, 0.93)   |
| <b>Women (n=2,345)</b>                                 | <b>Intervention</b>  | <b>Comparator</b>    | <b>Measure of Association</b> |                      |
| <b>Non-obese vs. obese</b>                             |                      |                      |                               |                      |
| Risk, %                                                | 6.24 (4.52, 7.97)    | 8.94 (6.45, 11.42)   | Hazard ratio                  | 0.69 (0.48, 1.01)    |
|                                                        |                      |                      | Risk ratio                    | 0.70 (0.50, 0.98)    |
|                                                        |                      |                      | Risk difference               | -2.69 (-5.37, -0.02) |
| RMST, years                                            | 19.48 (19.21, 19.76) | 19.38 (19.18, 19.59) | Difference in RMSTs, mos.     | 1.19 (-2.34, 4.71)   |
| <b>Non-obese vs. natural course</b>                    |                      |                      |                               |                      |
| Risk, %                                                | 6.24 (4.50, 7.98)    | 6.63 (5.46, 7.81)    | Hazard ratio                  | 0.93 (0.72, 1.21)    |
|                                                        |                      |                      | Risk ratio                    | 0.94 (0.76, 1.16)    |
|                                                        |                      |                      | Risk difference               | -0.39 (-1.80, 1.01)  |
| RMST, years                                            | 19.48 (19.20, 19.76) | 19.53 (19.44, 19.63) | Difference in RMSTs, mos.     | -0.58 (-3.74, 2.58)  |
| <b>10% decrease in BMI per year vs. natural course</b> |                      |                      |                               |                      |
| Risk, %                                                | 6.37 (5.20, 7.53)    | 6.63 (5.46, 7.81)    | Hazard ratio                  | 0.97 (0.82, 1.14)    |
|                                                        |                      |                      | Risk ratio                    | 0.96 (0.91, 1.01)    |
|                                                        |                      |                      | Risk difference               | -0.27 (-0.62, 0.08)  |
| RMST, years                                            | 19.54 (19.45, 19.64) | 19.53 (19.44, 19.63) | Difference in RMSTs, mos.     | 0.11 (-0.13, 0.35)   |

Numbers are estimates and 95% confidence intervals, obtained with 500 bootstrap samples.

**Table S4. G-formula associations per body mass index intervention group and contrasts between intervention groups at 20 years of follow-up in cancer-free participants. (n=3,870).**

|                                                        | Intervention         | Comparator           | Measure of Association    |                      |
|--------------------------------------------------------|----------------------|----------------------|---------------------------|----------------------|
| <b>Non-obese vs. obese</b>                             |                      |                      |                           |                      |
|                                                        |                      |                      | Hazard ratio              | 0.73 (0.55, 0.97)    |
| Risk, %                                                | 10.10 (8.01, 12.19)  | 13.60 (10.73, 16.46) | Risk ratio                | 0.74 (0.58, 0.95)    |
|                                                        |                      |                      | Risk difference           | -3.49 (-6.45, -0.54) |
| RMST, years                                            | 19.22 (18.94, 19.50) | 19.05 (18.84, 19.27) | Difference in RMSTs, mos. | 1.95 (-2.03, 5.92)   |
| <b>Non-obese vs. natural course</b>                    |                      |                      |                           |                      |
|                                                        |                      |                      | Hazard ratio              | 0.92 (0.76, 1.12)    |
| Risk, %                                                | 10.09 (8.00, 12.17)  | 10.93 (9.24, 12.62)  | Risk ratio                | 0.92 (0.80, 1.07)    |
|                                                        |                      |                      | Risk difference           | -0.85 (-2.34, 0.65)  |
| RMST, years                                            | 19.22 (18.94, 19.49) | 19.23 (19.11, 19.34) | Difference in RMSTs, mos. | -0.11 (-3.23, 3.01)  |
| <b>10% decrease in BMI per year vs. natural course</b> |                      |                      |                           |                      |
|                                                        |                      |                      | Hazard ratio              | 0.95 (0.85, 1.07)    |
| Risk, %                                                | 10.41 (8.72, 12.11)  | 10.93 (9.25, 12.61)  | Risk ratio                | 0.95 (0.90, 1.00)    |
|                                                        |                      |                      | Risk difference           | -0.51 (-1.07, 0.04)  |
| RMST, years                                            | 19.25 (19.14, 19.36) | 19.23 (19.11, 19.34) | Difference in RMSTs, mos. | 0.30 (-0.12, 0.71)   |

Numbers are estimates and 95% confidence intervals, obtained with 500 bootstrap samples.

**Table S5. G-formula associations per body mass index intervention group and contrasts between intervention groups at 20 years of follow-up, with complete case data at entry. (n=3,102)**

|                                                        | <b>Intervention</b>  | <b>Comparator</b>    | <b>Measure of Association</b> |                     |
|--------------------------------------------------------|----------------------|----------------------|-------------------------------|---------------------|
| <b>Non-obese vs. obese</b>                             |                      |                      |                               |                     |
|                                                        |                      |                      | Hazard ratio                  | 0.71 (0.51, 0.98)   |
| Risk, %                                                | 9.76 (7.64, 11.87)   | 13.58 (9.81, 17.34)  | Risk ratio                    | 0.72 (0.54, 0.96)   |
|                                                        |                      |                      | Risk difference               | -3.82 (-7.69, 0.05) |
| RMST, years                                            | 19.21 (18.84, 19.57) | 19.00 (18.44, 19.55) | Difference in RMSTs, mos.     | 2.52 (-4.49, 9.54)  |
| <b>Non-obese vs. natural course</b>                    |                      |                      |                               |                     |
|                                                        |                      |                      | Hazard ratio                  | 0.97 (0.78, 1.20)   |
| Risk, %                                                | 9.77 (7.65, 11.90)   | 10.15 (8.89, 11.42)  | Risk ratio                    | 0.96 (0.81, 1.14)   |
|                                                        |                      |                      | Risk difference               | -0.38 (-2.15, 1.39) |
| RMST, years                                            | 19.20 (18.84, 19.56) | 19.25 (19.15, 19.36) | Difference in RMSTs, mos.     | -0.62 (-4.74, 3.49) |
| <b>10% decrease in BMI per year vs. natural course</b> |                      |                      |                               |                     |
|                                                        |                      |                      | Hazard ratio                  | 0.96 (0.84, 1.10)   |
| Risk, %                                                | 9.64 (8.25, 11.03)   | 10.14 (8.86, 11.43)  | Risk ratio                    | 0.95 (0.88, 1.02)   |
|                                                        |                      |                      | Risk difference               | -0.51 (-1.19, 0.17) |
| RMST, years                                            | 19.27 (19.16, 19.39) | 19.26 (19.15, 19.36) | Difference in RMSTs, mos.     | 0.23 (-0.32, 0.78)  |

Numbers are estimates and 95% confidence intervals, obtained with 500 bootstrap samples.

**Table S6. G-formula associations per body mass index intervention group and contrasts between intervention groups at 20 years of follow-up, entry at age 60 plus or minus five years (n=6,149).**

|                                                        | Intervention         | Comparator           | Measure of Association    |                      |
|--------------------------------------------------------|----------------------|----------------------|---------------------------|----------------------|
| <b>Non-obese vs. obese</b>                             |                      |                      |                           |                      |
|                                                        |                      |                      | Hazard ratio              | 0.87 (0.77, 0.99)    |
| Risk, %                                                | 19.90 (18.35, 21.45) | 22.66 (20.33, 25.00) | Risk ratio                | 0.88 (0.80, 0.97)    |
|                                                        |                      |                      | Risk difference           | -2.76 (-4.89, -0.63) |
| RMST, years                                            | 18.35 (18.18, 18.52) | 18.22 (18.02, 18.42) | Difference in RMSTs, mos. | 1.56 (-0.88, 4.01)   |
| <b>Non-obese vs. natural course</b>                    |                      |                      |                           |                      |
|                                                        |                      |                      | Hazard ratio              | 0.96 (0.87, 1.06)    |
| Risk, %                                                | 19.92 (18.36, 21.47) | 20.65 (19.21, 22.09) | Risk ratio                | 0.96 (0.93, 1.00)    |
|                                                        |                      |                      | Risk difference           | -0.73 (-1.50, 0.03)  |
| RMST, years                                            | 18.35 (18.18, 18.51) | 18.33 (18.21, 18.46) | Difference in RMSTs, mos. | 0.17 (-1.17, 1.52)   |
| <b>10% decrease in BMI per year vs. natural course</b> |                      |                      |                           |                      |
|                                                        |                      |                      | Hazard ratio              | 0.99 (0.90, 1.08)    |
| Risk, %                                                | 20.44 (18.98, 21.89) | 20.64 (19.18, 22.09) | Risk ratio                | 0.99 (0.97, 1.01)    |
|                                                        |                      |                      | Risk difference           | -0.20 (-0.62, 0.23)  |
| RMST, years                                            | 18.34 (18.21, 18.46) | 18.33 (18.21, 18.46) | Difference in RMSTs, mos. | 0.01 (-0.35, 0.37)   |

Numbers are estimates and 95% confidence intervals, obtained with 500 bootstrap samples.



**Table S7. G-formula associations per body mass index intervention group and contrasts between intervention groups at 20 years of follow-up, negative binomial model for atrial fibrillation (n=4,392).**

|                                                        | <b>Intervention</b>  | <b>Comparator</b>    | <b>Measure of Association</b> |                      |
|--------------------------------------------------------|----------------------|----------------------|-------------------------------|----------------------|
| <b>Non-obese vs. obese</b>                             |                      |                      |                               |                      |
|                                                        |                      |                      | Hazard ratio                  | 0.72 (0.58, 0.89)    |
| Risk, %                                                | 9.78 (8.40, 11.16)   | 13.18 (11.22, 15.14) | Risk ratio                    | 0.74 (0.63, 0.88)    |
|                                                        |                      |                      | Risk difference               | -3.40 (-5.45, -1.34) |
| RMST, years                                            | 19.24 (19.05, 19.43) | 19.04 (18.87, 19.20) | Difference in RMSTs, mos.     | 2.39 (-0.28, 5.06)   |
| <b>Non-obese vs. natural course</b>                    |                      |                      |                               |                      |
|                                                        |                      |                      | Hazard ratio                  | 0.91 (0.78, 1.07)    |
| Risk, %                                                | 9.79 (8.41, 11.17)   | 10.74 (9.64, 11.84)  | Risk ratio                    | 0.91 (0.83, 1.00)    |
|                                                        |                      |                      | Risk difference               | -0.95 (-1.93, 0.04)  |
| RMST, years                                            | 19.24 (19.05, 19.43) | 19.20 (19.11, 19.29) | Difference in RMSTs, mos.     | 0.44 (-1.58, 2.46)   |
| <b>10% decrease in BMI per year vs. natural course</b> |                      |                      |                               |                      |
|                                                        |                      |                      | Hazard ratio                  | 0.97 (0.86, 1.09)    |
| Risk, %                                                | 10.35 (9.15, 11.54)  | 10.77 (9.59, 11.95)  | Risk ratio                    | 0.96 (0.92, 1.00)    |
|                                                        |                      |                      | Risk difference               | -0.42 (-0.84, -0.01) |
| RMST, years                                            | 19.22 (19.12, 19.32) | 19.20 (19.10, 19.30) | Difference in RMSTs, mos.     | 0.23 (-0.10, 0.56)   |

Numbers are estimates and 95% confidence intervals, obtained with 500 bootstrap samples.

Figure S1. Diagram of g-formula Monte Carlo simulation.

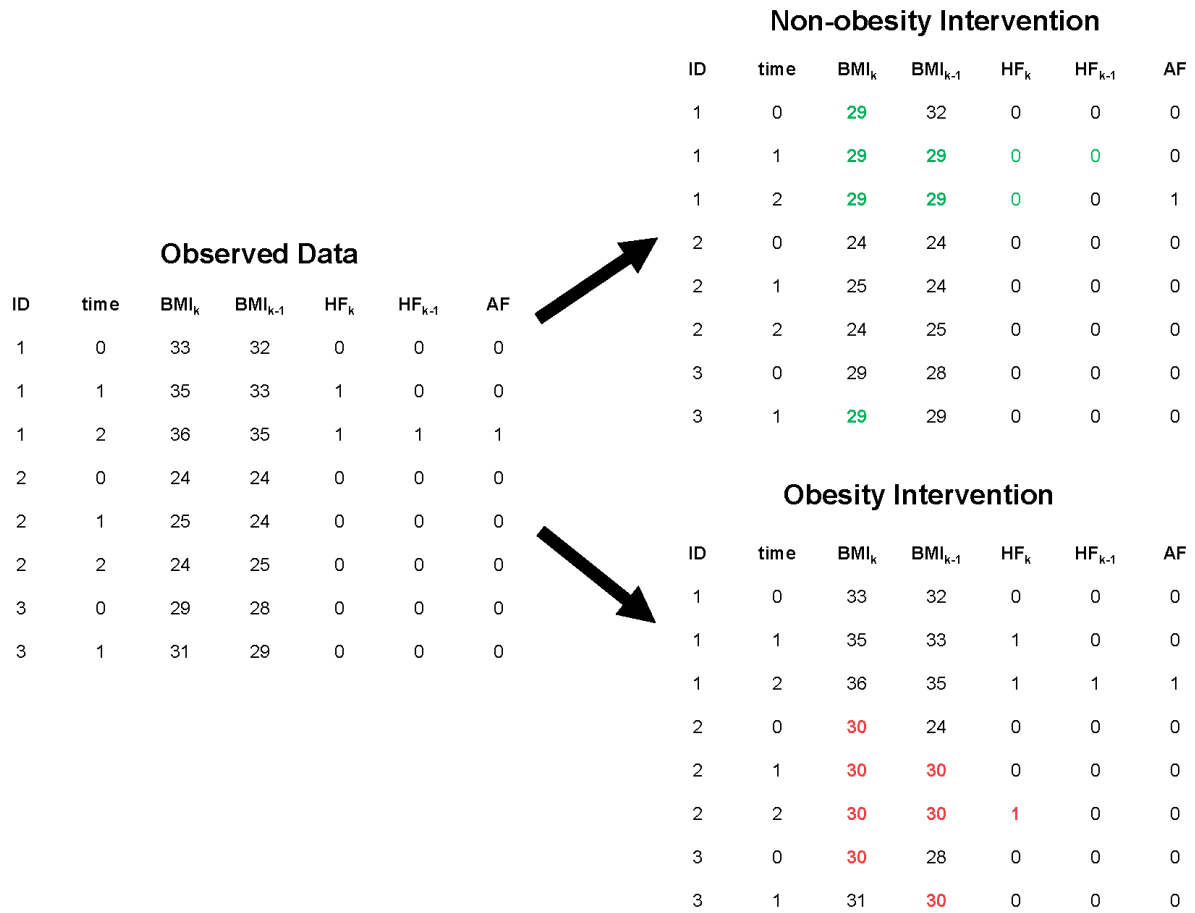

**Figure S2. Flow diagram of study participants.**

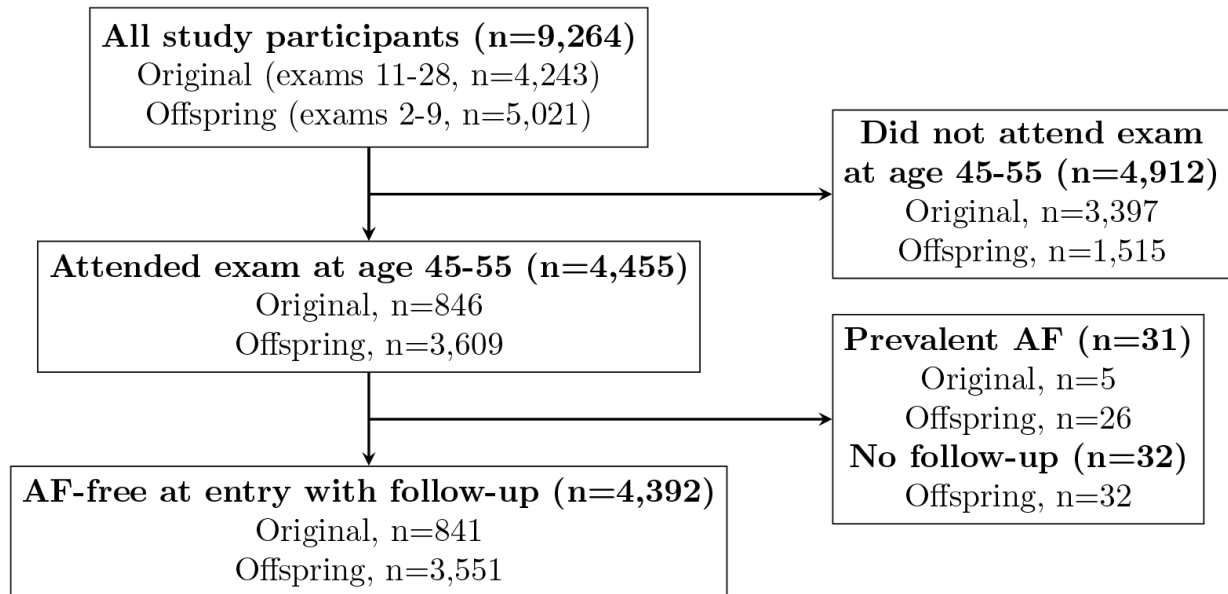

**Figure S3. Kaplan Meier curves of g-formula survival probabilities comparing simulated populations under BMI interventions in men and women.**

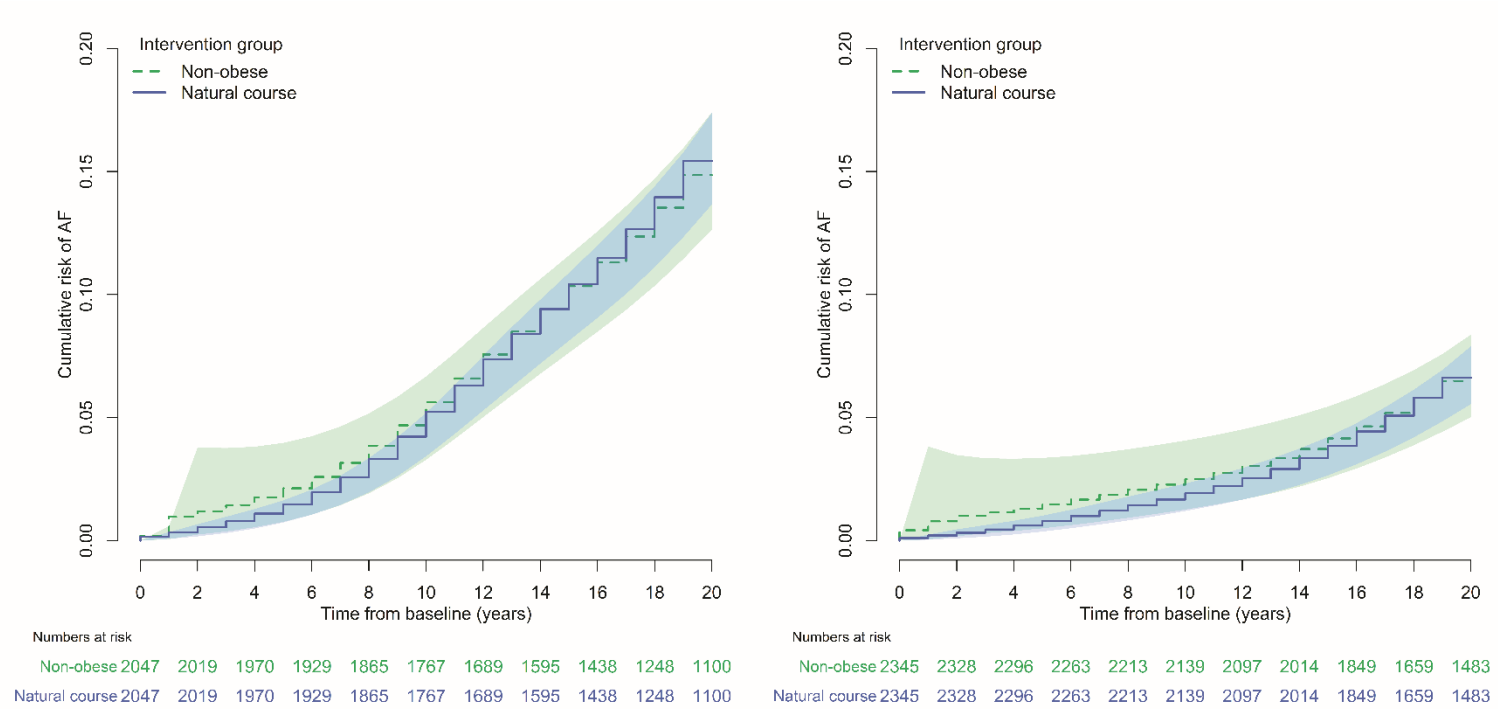

Supplement: JAH3-8-e013011-s001.pdf [file JAH3-8-e013011-s001.pdf]
